# Supplementary material for: Continuous production of 1,2-pentanediol from furfuryl alcohol over highly stable bimetallic Ni–Sn alloy catalysts
Source: Royal Society of Chemistry journal article supplement (doi:10.1039/d4gc02757d), 2024-01-01
Supplement: d4gc02757d1.pdf [file d4gc02757d1.pdf]

Electronic Supplementary Material (ESI) for Green Chemistry.  
This journal is © The Royal Society of Chemistry 2024

## Supplementary Information

### Continuous Production of 1,2-Pentanediol from Furfuryl Alcohol over Highly Stable Bimetallic Ni–Sn Alloy Catalysts

Ajaysing S. Nimbalkar<sup>a,b</sup>, Kyung-Ryul Oh<sup>a</sup>, Do-Young Hong<sup>a,b</sup>, Byung Gyu Park<sup>c</sup>, Maeum Lee<sup>a</sup>, Dong Won Hwang<sup>a,b</sup>, Ali Awad<sup>a,b</sup>, Pravin P. Upare<sup>c,\*</sup>, Seung Ju Han<sup>d,\*</sup> and Young Kyu Hwang<sup>a,b,\*</sup>

<sup>a</sup>Research Center for Nanocatalysts, Chemical & Process Technology Division, Korea Research Institute of Chemical Technology (KRICT), Daejeon 34114, Korea

<sup>b</sup>Department of Advanced Materials and Chemical Engineering, University of Science and Technology (UST), Daejeon, 34113, Korea

<sup>c</sup>Activon Co. Ltd. Ochang-Eup, Cheongwon-gu, Cheongju, Chungcheongbukdo 28104, Korea

<sup>d</sup>C1 Gas & Carbon Convergent Research Center, Chemical & Process Technology Division, Research Institute of Chemical Technology (KRICT), Daejeon 34114, Korea

\*Corresponding authors.

\*E-mail addresses: [pravin2122@activon.kr](mailto:pravin2122@activon.kr) (P. P. Upare), [hansj@kRICT.re.kr](mailto:hansj@kRICT.re.kr) (S. J. Han), [ykhwang@kRICT.re.kr](mailto:ykhwang@kRICT.re.kr) (Y. K. Hwang).

## Synthesis of Co-Sn and Cu-Sn supported ZnO catalysts

The Co-Sn and Cu-Sn supported ZnO catalysts, containing a total metal concentration of 10%, were synthesized by the sequential co-precipitation-deposition method. The catalysts Co-Sn(10%)/ZnO and Cu-Sn(10%)/ZnO were prepared by dissolving prescribed amounts of  $\text{Zn}(\text{NO}_3)_2 \cdot 6\text{H}_2\text{O}$  (99.9%),  $\text{SnCl}_4 \cdot 5\text{H}_2\text{O}$  (99.9%), and  $\text{Cu}(\text{NO}_3)_2 \cdot x\text{H}_2\text{O}$  (99.9%) or  $\text{Co}(\text{NO}_3)_2 \cdot 6\text{H}_2\text{O}$  (99.9%) separately in 400 mL of distilled water for 1 h. Subsequently, the mixtures underwent the co-precipitation and agitation process under the same conditions as those used for the 3Ni-3Sn/ZnO catalyst.

## Product analysis details

The liquid samples underwent examination utilizing a gas chromatography (Donam GC, DS6200) equipped with a flame ionization detector (FID) and capillary column (HP-INNOWAX). Considering the clear separation of peaks (**Fig. S10**), n-octane was employed as an internal standard. The response factor for each product in equal concentrated was calculated from multiple injections with a known amount of internal standard. Finally, the conversion and product yield were calculated from the GC areas of initial feed and product with a known amount of n-octane using the formulas,

$$\text{Conversion of FAL (mol\%)} = \frac{\text{Initial moles of FAL} - \text{unreacted moles of FAL}}{\text{Initial moles of FAL in feed}} \times 100 (\%)$$

$$\text{Product yield (mol\%)} = \frac{\text{Moles of desired product}}{\text{Initial moles of FAL in feed}} \times 100 (\%)$$

The carbon balances of each product were calculated based on reaction mass balance and GC data.

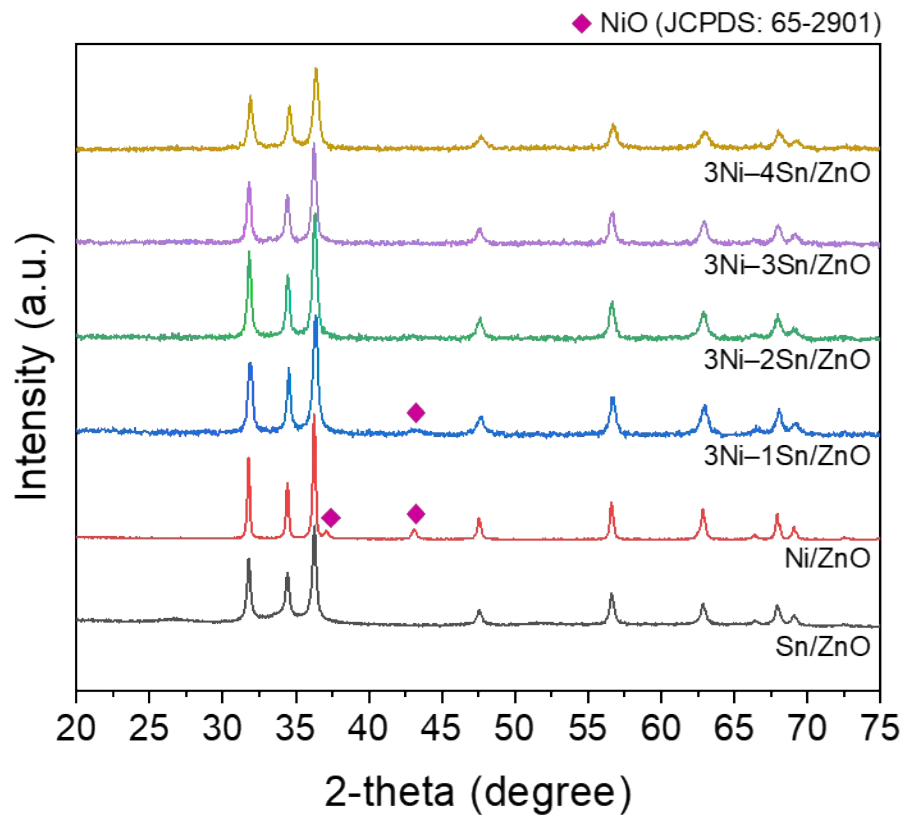

**Fig. S1** XRD patterns of calcined Sn/ZnO, Ni/ZnO, 3Ni-1Sn/ZnO, 3Ni-2Sn/ZnO, 3Ni-3Sn/ZnO, and 3Ni-4Sn/ZnO.

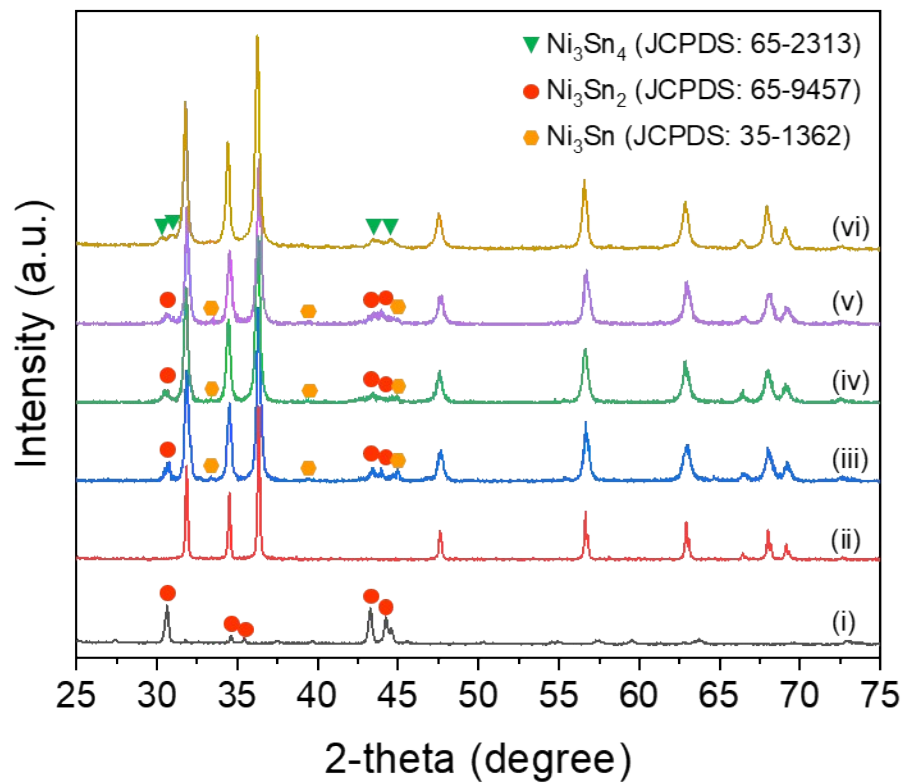

**Fig. S2** XRD patterns of reduced (i) unsupported Ni-Sn, (ii) ZnO support, (iii) 3Ni-1Sn/ZnO, (iv) 3Ni-2Sn/ZnO, (v) 3Ni-3Sn/ZnO, and (vi) 3Ni-4Sn/ZnO catalysts.

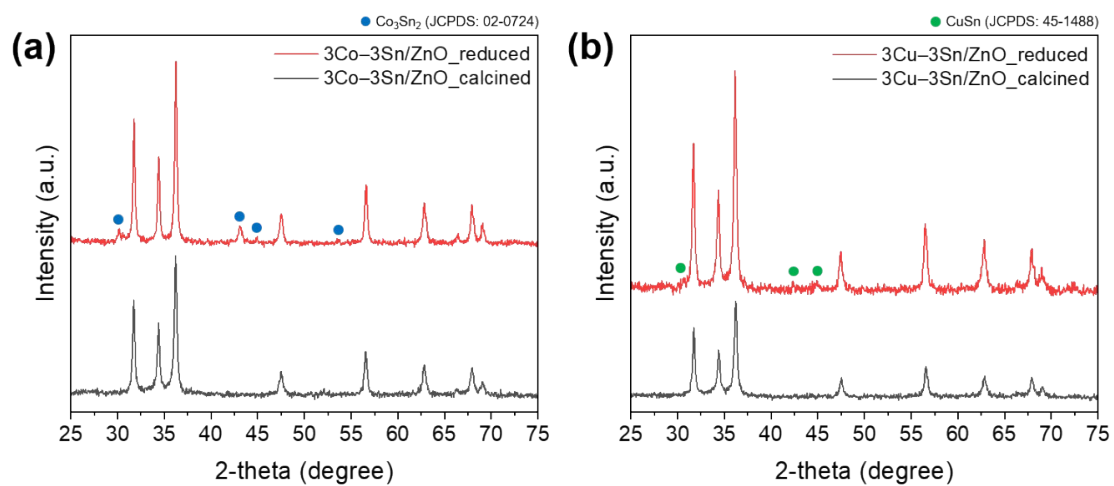

**Fig. S3** XRD patterns of calcined and reduced (a) Co-Sn/ZnO and (b) Cu-Sn/ZnO catalysts.

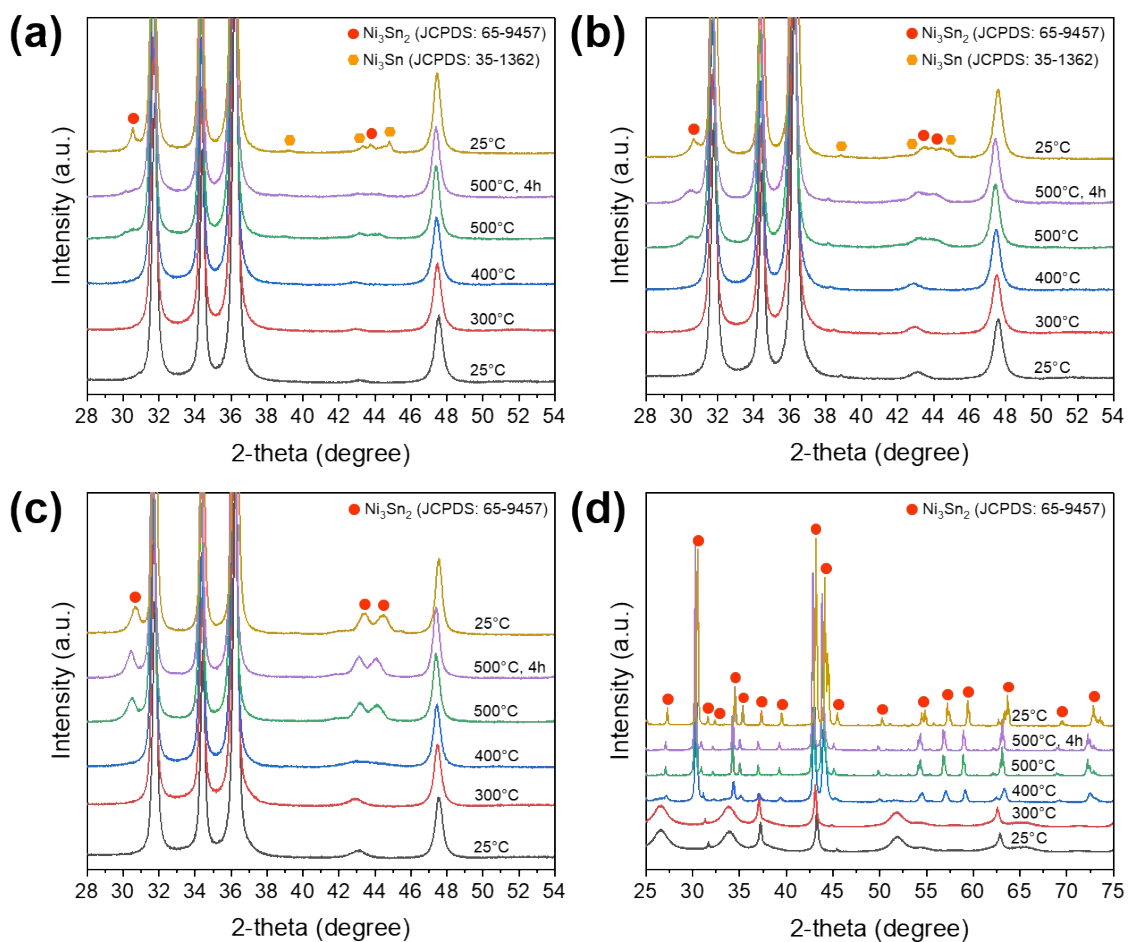

**Fig. S4** In-situ XRD patterns of calcined (a) 3Ni-3Sn(4%)/ZnO, (b) 3Ni-3Sn(6%)/ZnO, (c) 3Ni-2Sn/ZnO, and (d) unsupported 3Ni-2Sn catalysts under 10% H<sub>2</sub>/Ar flow.

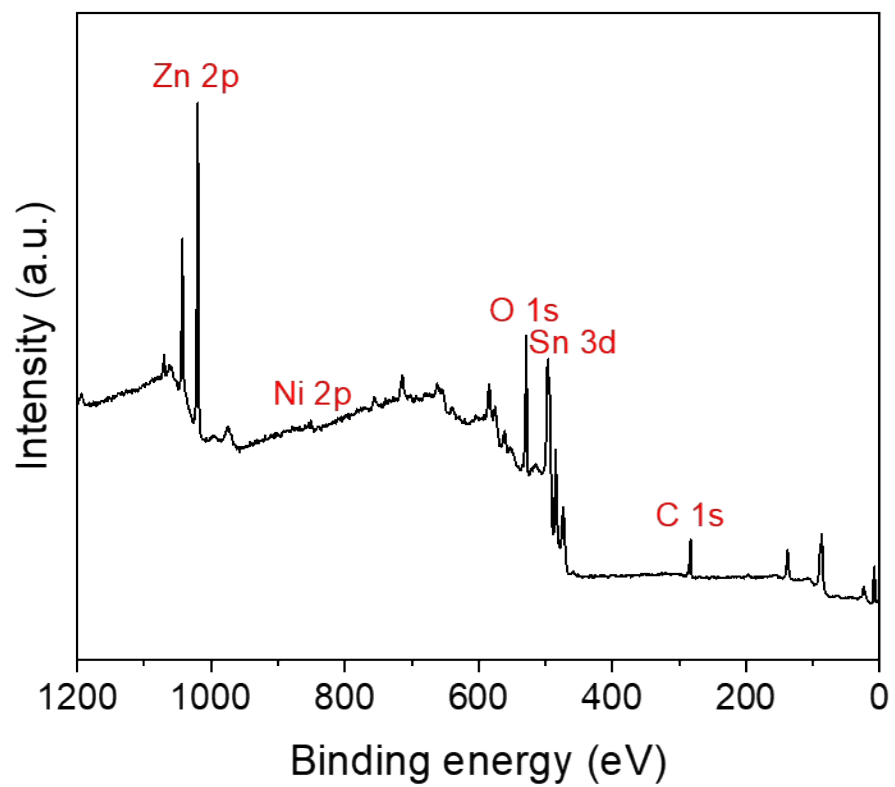

**Fig. S5** XPS survey spectra for the reduced 3Ni-3Sn/ZnO catalyst.

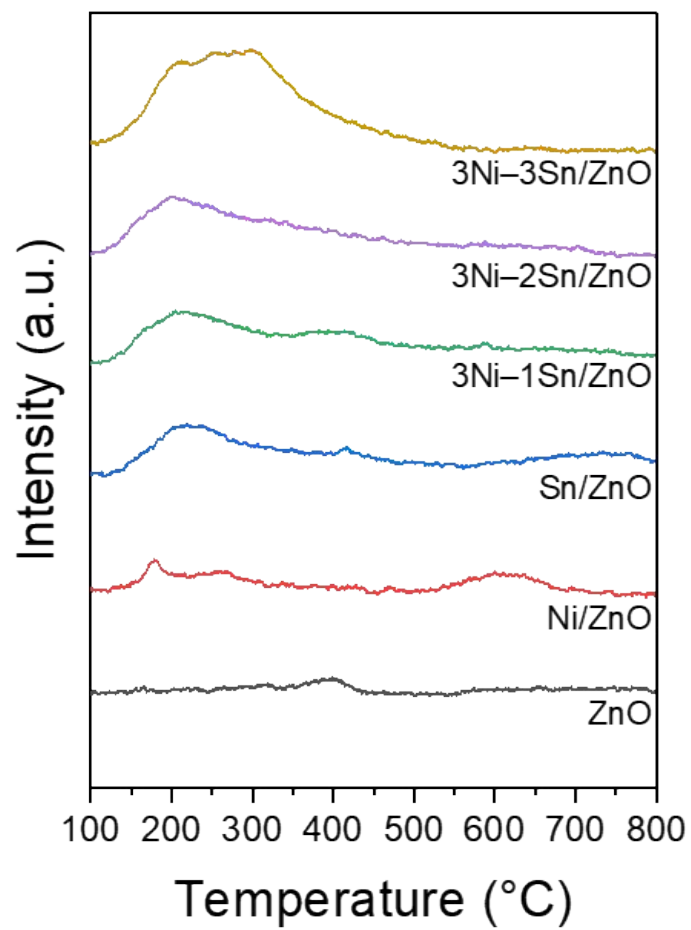

**Fig. S6** NH<sub>3</sub>-TPD results of the synthesized catalysts.



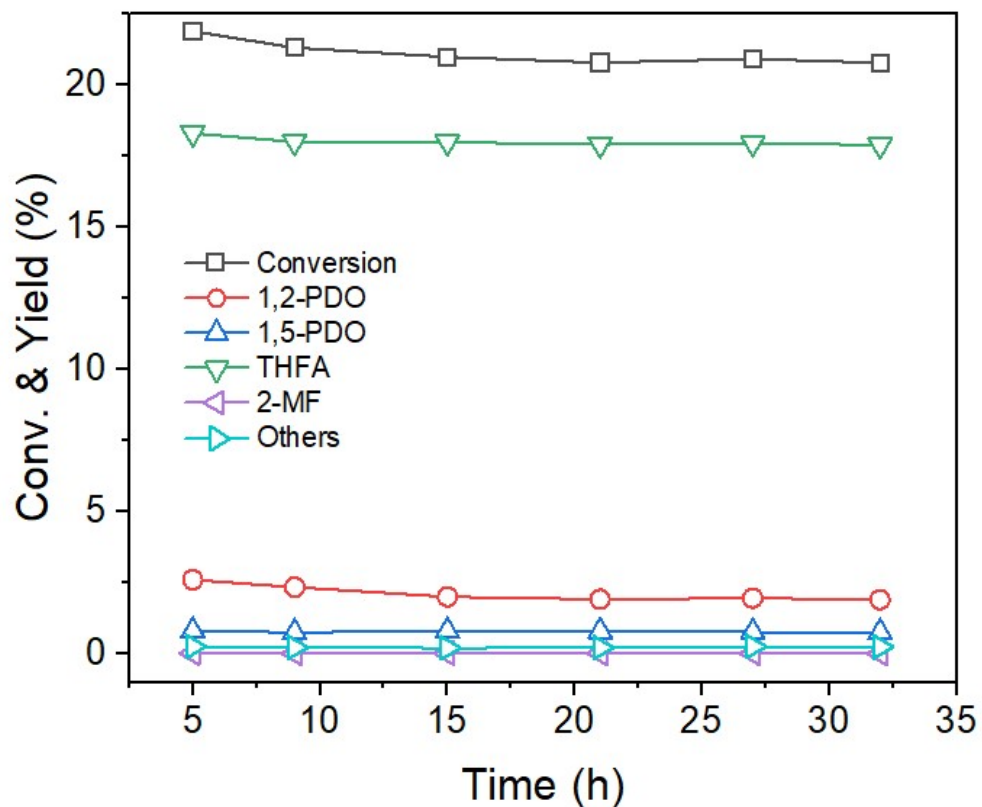

**Fig. S7** Time-on-stream data for the furfuryl alcohol (FAL) hydrogenolysis over 3Ni–3Sn/ZnO catalyst at low conversion level. Reaction conditions: 10% FAL in IPA, 1.0 g catalyst, 250 °C, WHSV= 5.0, H<sub>2</sub> 40 bar, H<sub>2</sub> flow 61 cc/min, TOS <30 h.

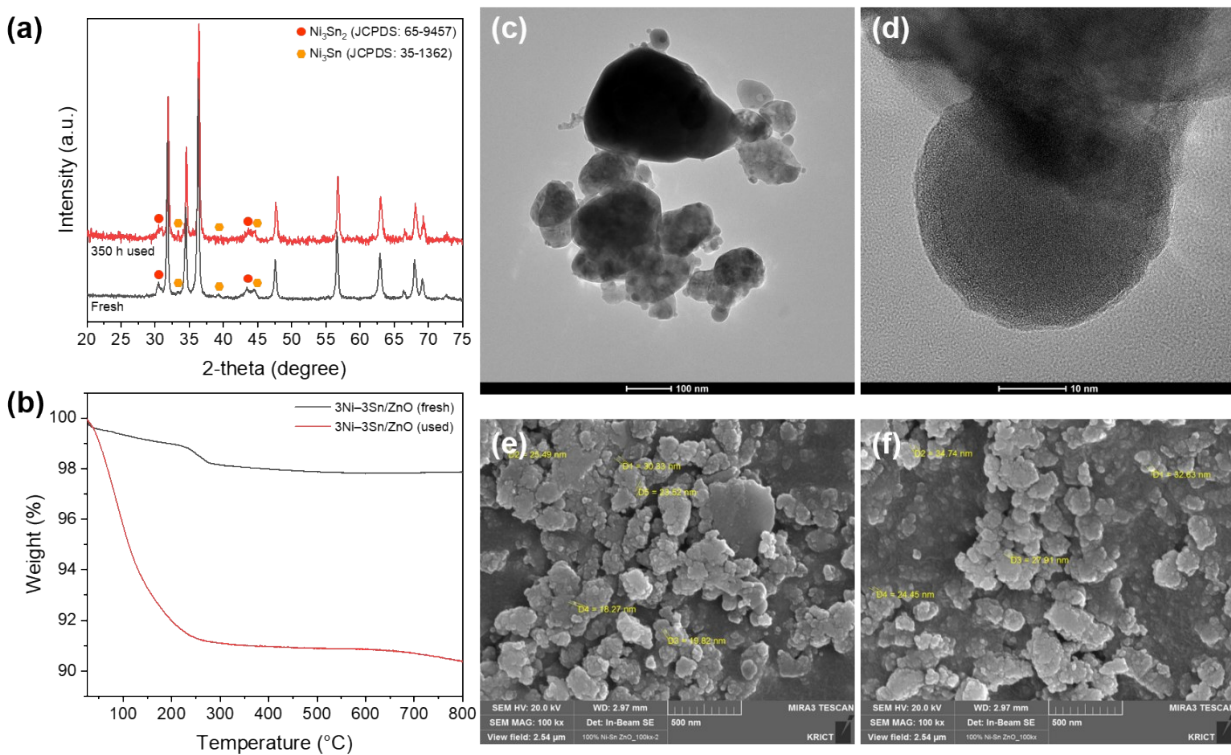

**Fig. S8** (a) XRD and (b) TGA patterns of the fresh and used catalysts after 450 h reaction. (c), (d) TEM images of the used 3Ni-3Sn/ZnO catalyst. SEM images of (e) fresh and (f) used 3Ni-3Sn/ZnO catalysts.

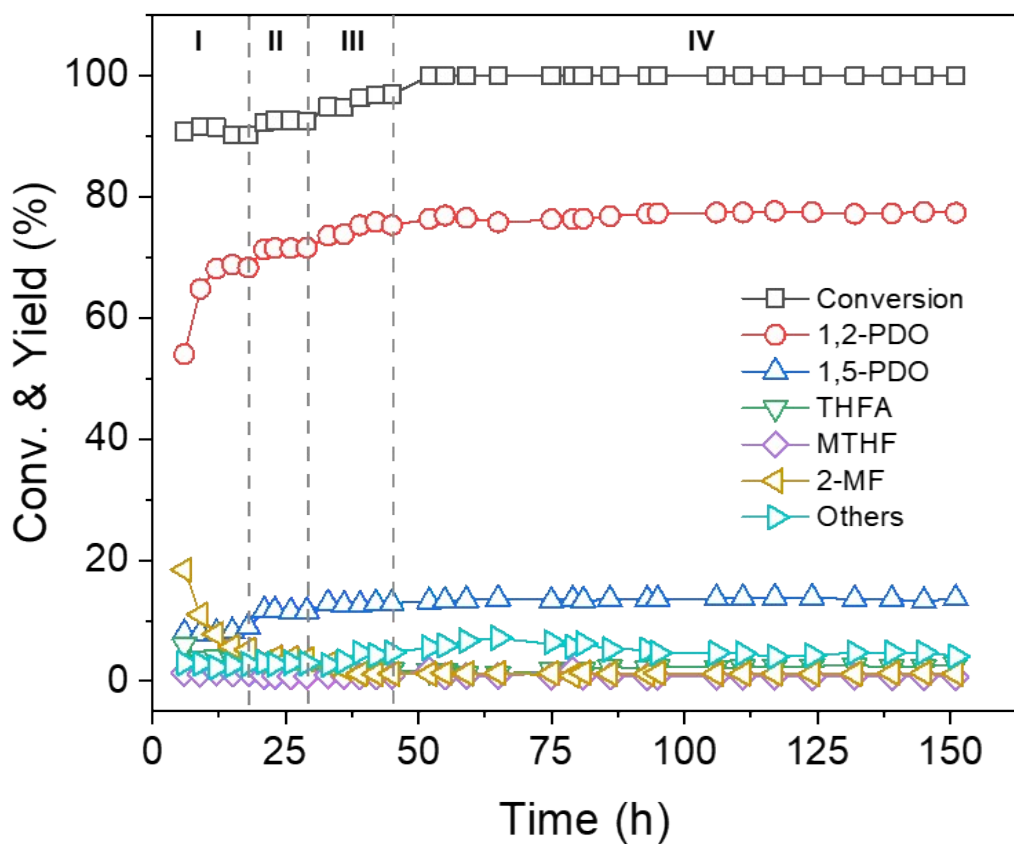

**Fig. S9** Time-on-stream data for the furfuryl alcohol (FAL) hydrogenolysis over 3Ni-3Sn(10%)/ZnO catalyst in an 1-inch scale-up reactor. Reaction conditions: 10% FAL in IPA, WHSV = 0.71, H<sub>2</sub> 40 bar, H<sub>2</sub> flow 600 cc/min, TOS <150 h. Temperature optimizations for the preheating zone/reaction zone: (I) 210°C/290°C, (II) 240°C/290°C, (III) 260°C/290°C, and (IV) 270°C/290°C.

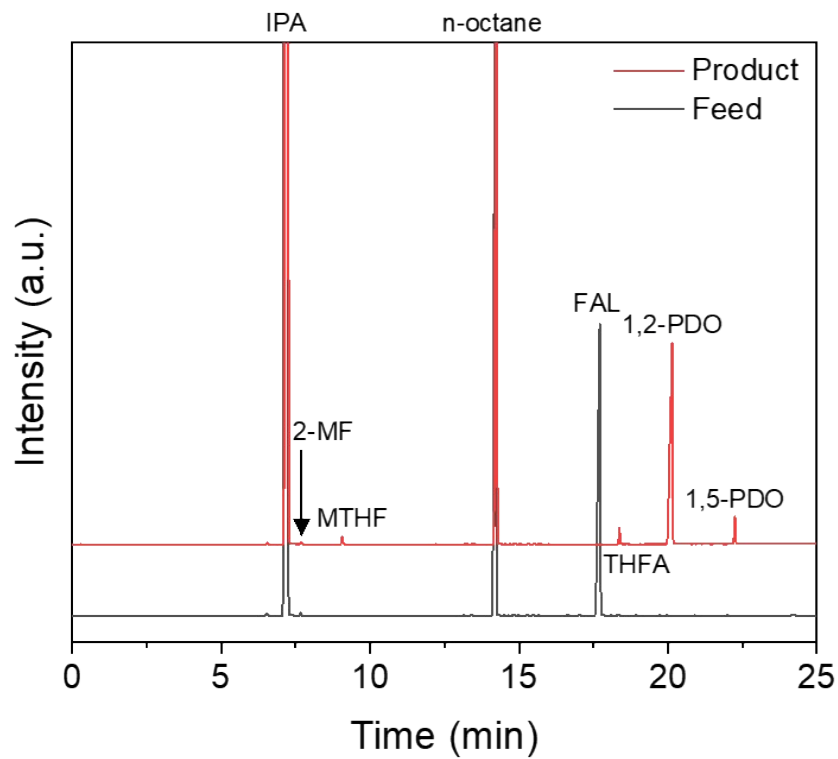

**Fig. S10** GC chromatographs of the 10% furfuryl alcohol (FAL) feed solution (black) and the reaction product (red) with n-octane as an internal standard at 100% conversion.

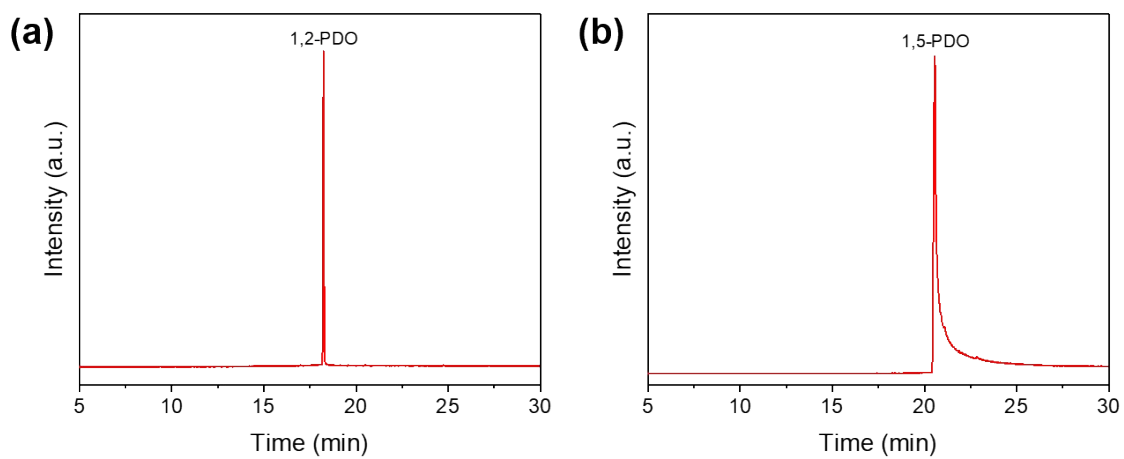

**Fig. S11** GC results of isolated (a) 1,2-PDO and (b) 1,5-PDO by distillation process.

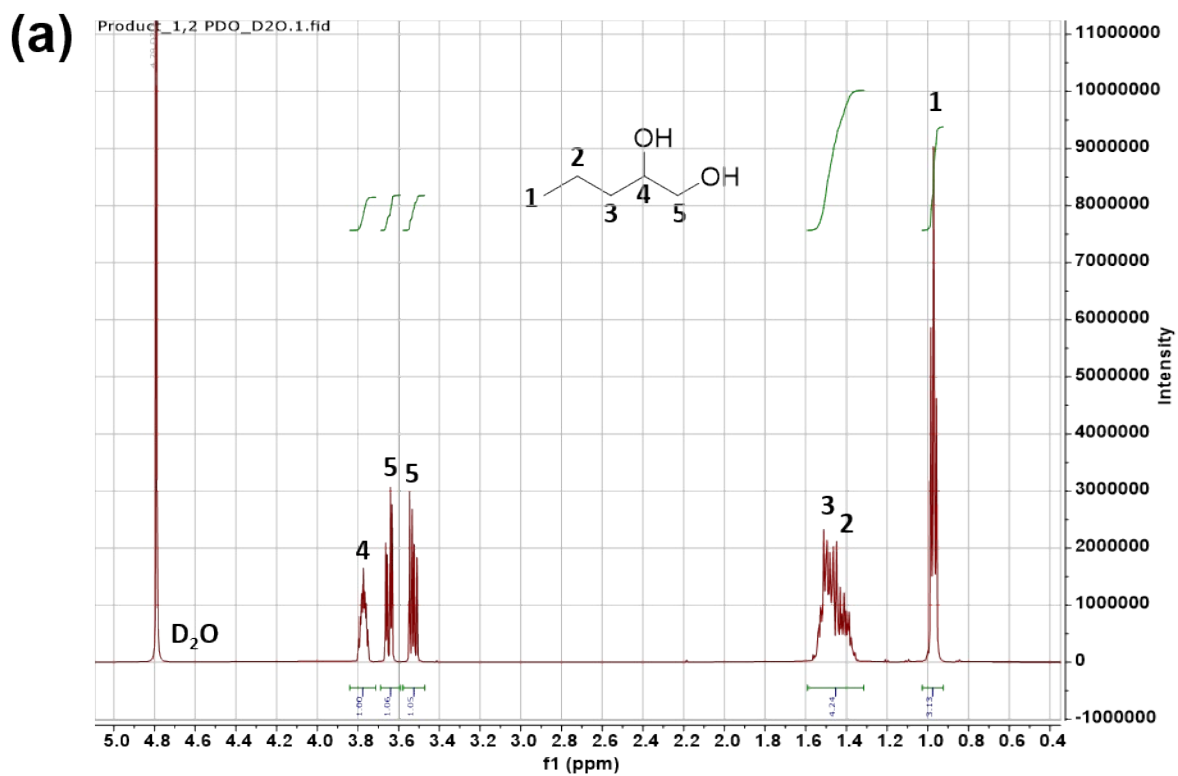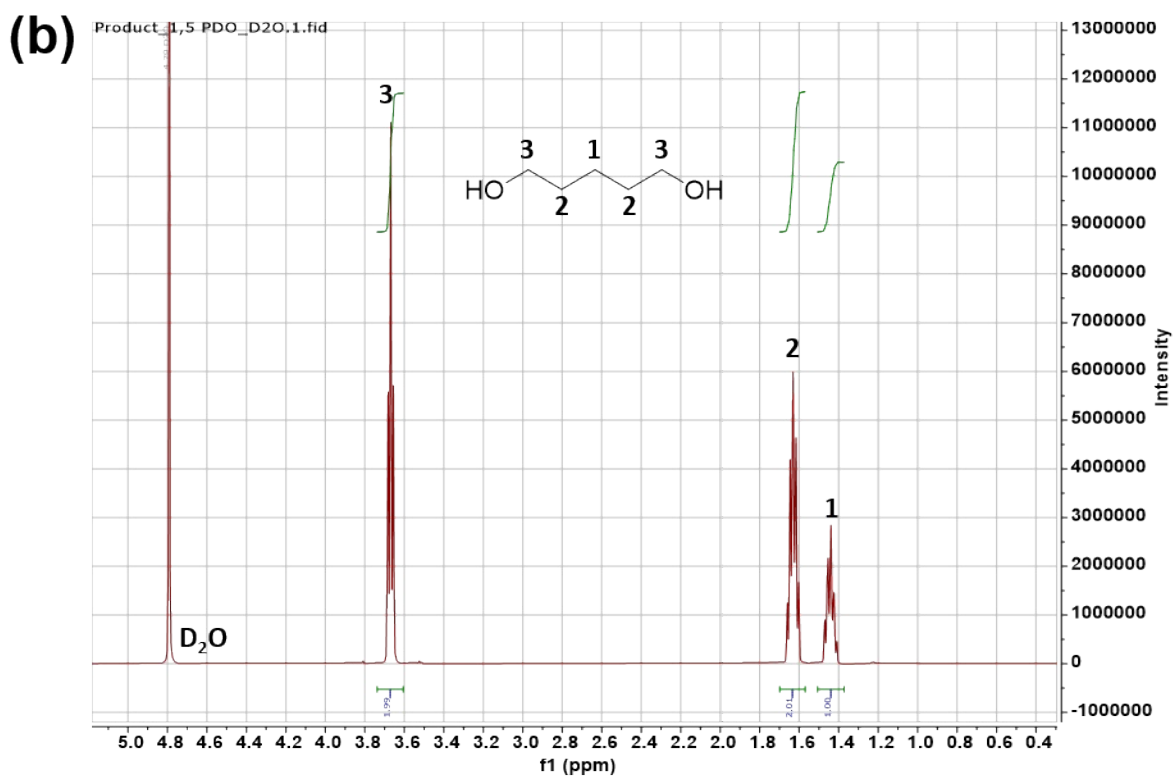

**Fig. S12**  $^1\text{H}$ -NMR spectra of isolated (a) 1,2-PDO and (b) 1,5-PDO by distillation process.

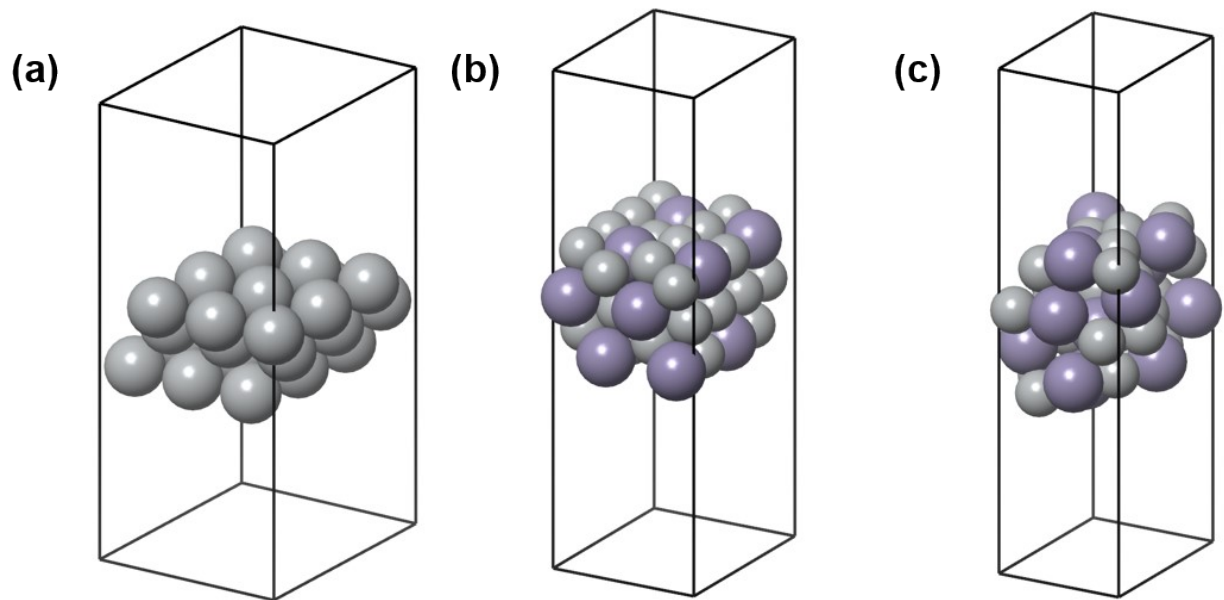

**Fig. S13** Diagonal view of (a) Ni (111), (b) Ni<sub>3</sub>Sn (100), and (c) Ni<sub>3</sub>Sn<sub>2</sub> (101) surface slabs used for DFT study.

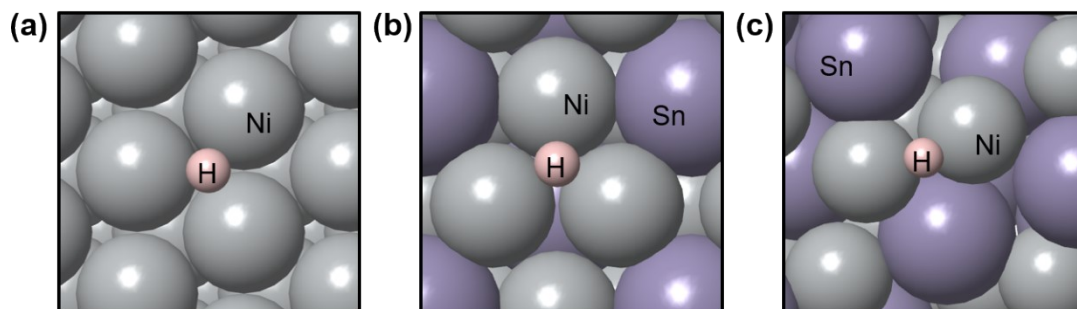

**Fig. S14** Top view of H adsorption configuration on (a) Ni (111), (b) Ni<sub>3</sub>Sn (100), and (c) Ni<sub>3</sub>Sn<sub>2</sub> (101) surfaces.



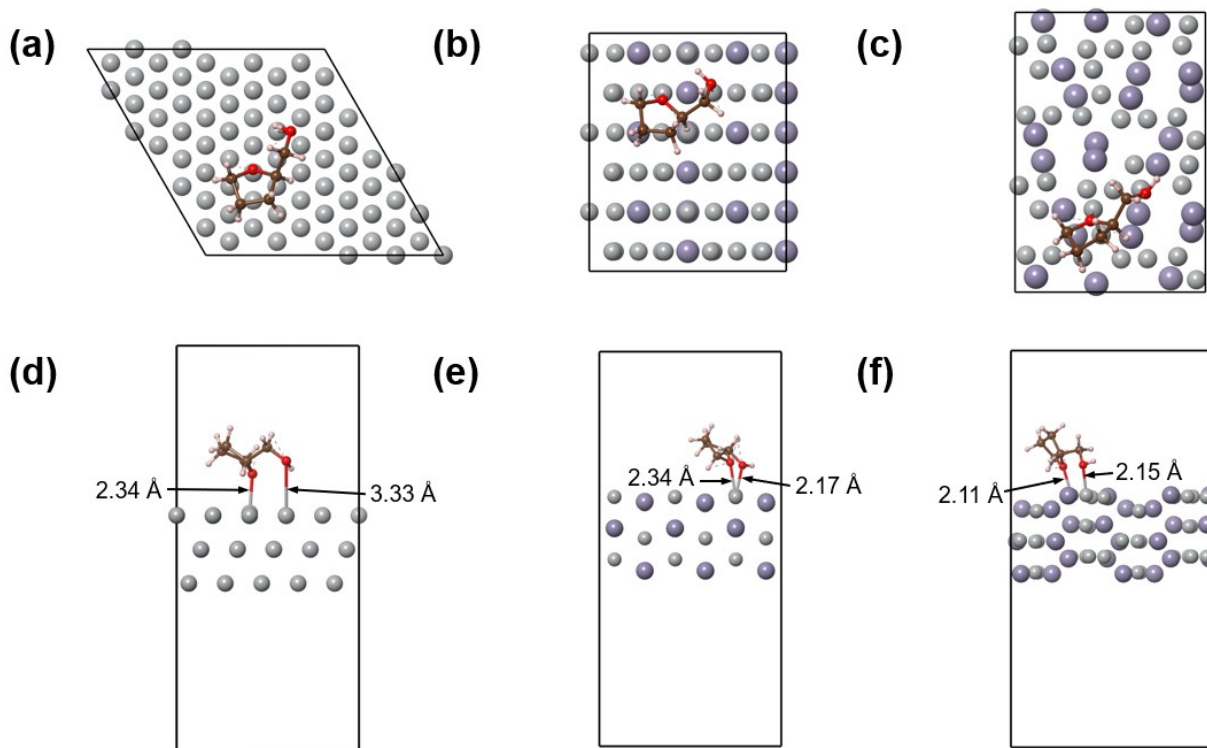

**Fig. S15** Top and side views of optimized configurations of THFA adsorption on (a) Ni (111), (b) Ni<sub>3</sub>Sn (100), and Ni<sub>3</sub>Sn<sub>2</sub> (101) surfaces. The bond lengths between THFA and surfaces are included.

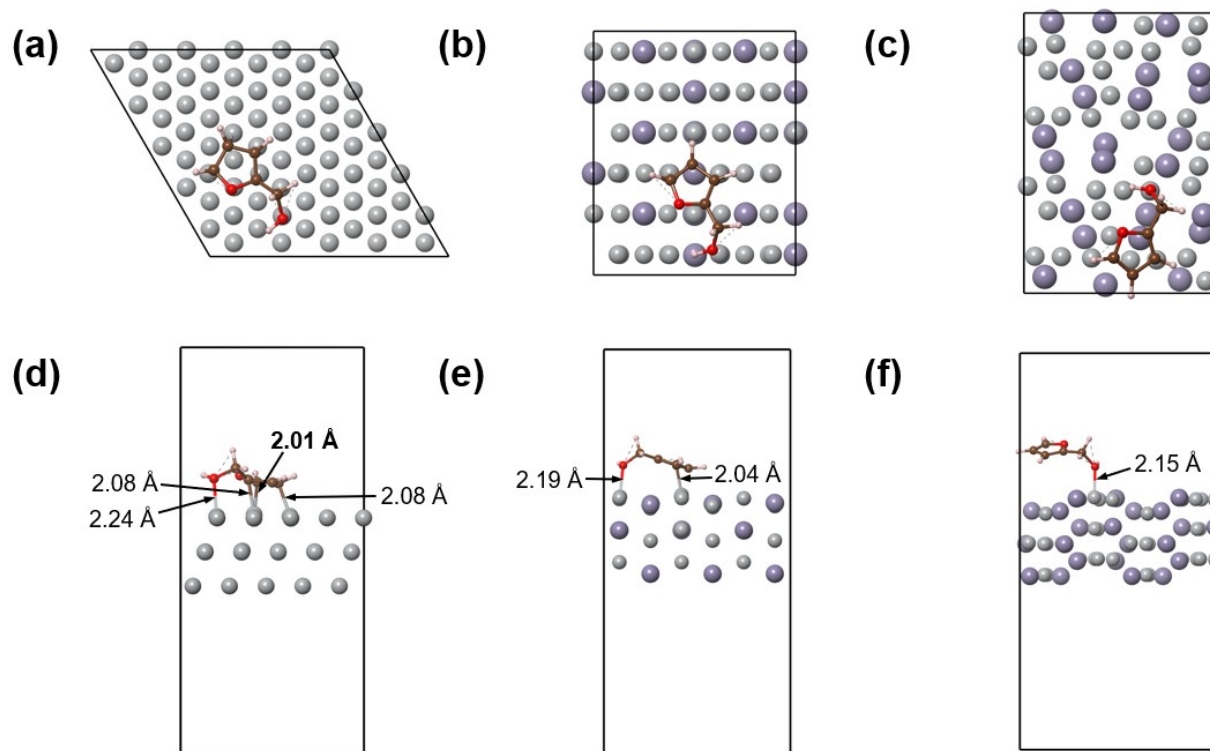

**Fig. S16** Top and side views of optimized configuration of FAL adsorption on (a) Ni (111), (b) Ni<sub>3</sub>Sn (100), and (c) Ni<sub>3</sub>Sn<sub>2</sub> (101) surfaces. The bond lengths between FAL and surfaces are included.

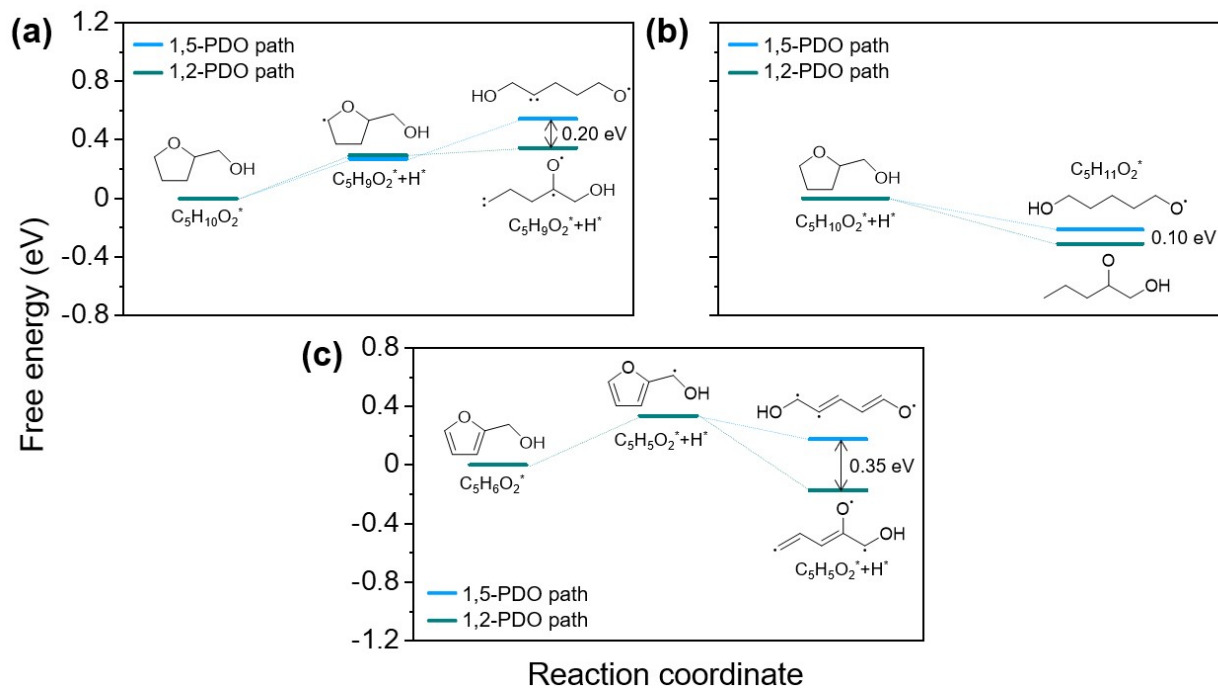

**Fig. S17** Relative energy diagrams for (a) THFA dehydrogenation-scission mechanism, (b) THFA hydrogenolysis mechanism, and (c) FAL dehydrogenation-scission mechanism on Ni (111) surface.  $T = 250\text{ }^\circ\text{C}$  and  $P = 6\text{ MPa}$ .

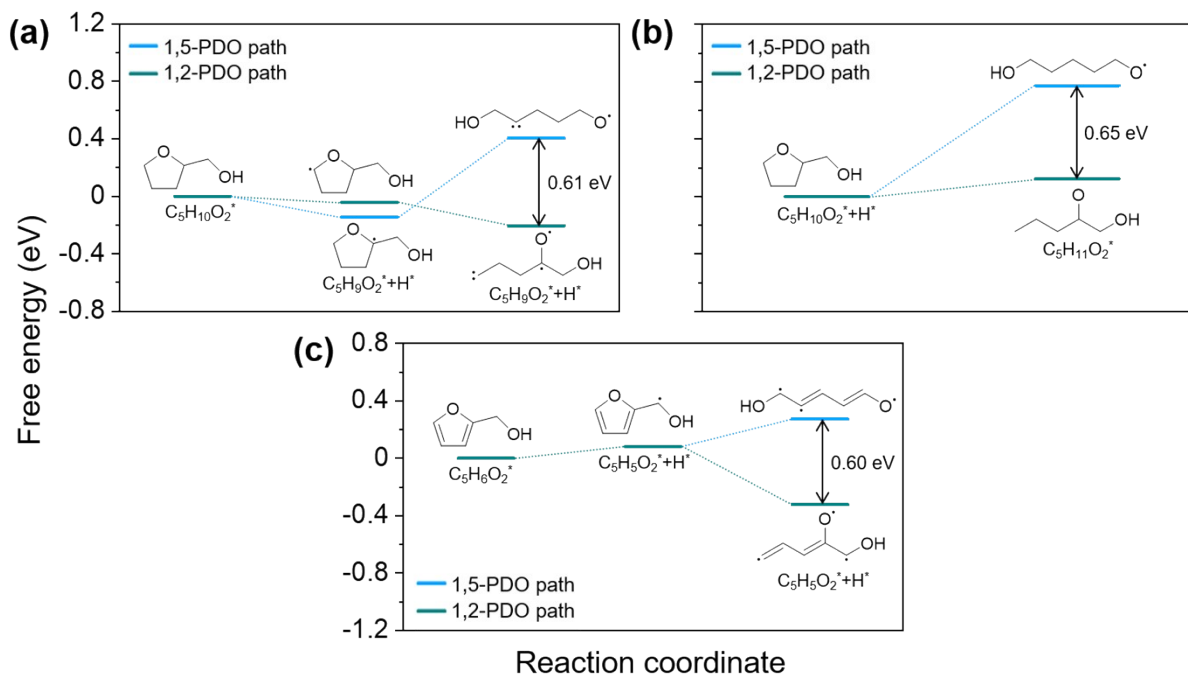

**Fig. S18** Relative energy diagrams for (a) THFA dehydrogenation-scission mechanism, (b) THFA hydrogenolysis mechanism, and (c) FAL dehydrogenation-scission mechanism on  $\text{Ni}_3\text{Sn}$  (100) surface.  $T = 250\text{ }^\circ\text{C}$  and  $P = 6\text{ MPa}$ .

**Table S1.** Amounts of precursors used in the catalyst synthesis.

| <b>Catalyst</b>                        | <b>Ni(NO<sub>3</sub>)<sub>2</sub>·6H<sub>2</sub>O (g)</b> | <b>SnCl<sub>4</sub>·5H<sub>2</sub>O (g)</b> | <b>Zn(NO<sub>3</sub>)<sub>2</sub>·6H<sub>2</sub>O (g)</b> |
|----------------------------------------|-----------------------------------------------------------|---------------------------------------------|-----------------------------------------------------------|
| Ni/ZnO                                 | 4.95                                                      | -                                           | 33.23                                                     |
| Sn/ZnO                                 | -                                                         | 3.50                                        | 33.23                                                     |
| 3Ni-1Sn/ZnO                            | 2.95                                                      | 1.18                                        | 33.23                                                     |
| 3Ni-2Sn/ZnO                            | 2.10                                                      | 1.69                                        | 33.23                                                     |
| 3Ni-3Sn/ZnO                            | 1.63                                                      | 1.97                                        | 33.23                                                     |
| 3Ni-4Sn/ZnO                            | 1.34                                                      | 2.15                                        | 33.23                                                     |
| 3Ni-3Sn(6%)/ZnO                        | 0.98                                                      | 1.36                                        | 33.23                                                     |
| 3Ni-3Sn(4%)/ZnO                        | 0.66                                                      | 0.79                                        | 33.23                                                     |
|                                        | <b>Ni(NO<sub>3</sub>)<sub>2</sub>·6H<sub>2</sub>O (g)</b> | <b>SnCl<sub>4</sub>·5H<sub>2</sub>O (g)</b> | <b>Al(NO<sub>3</sub>)<sub>3</sub>·9H<sub>2</sub>O (g)</b> |
| 3Ni-3Sn/Al <sub>2</sub> O <sub>3</sub> | 1.63                                                      | 1.97                                        | 33.11                                                     |
|                                        | <b>Ni(NO<sub>3</sub>)<sub>2</sub>·6H<sub>2</sub>O (g)</b> | <b>SnCl<sub>4</sub>·5H<sub>2</sub>O (g)</b> | <b>Ce(NO<sub>3</sub>)<sub>3</sub>·6H<sub>2</sub>O (g)</b> |
| 3Ni-3Sn/CeO <sub>2</sub>               | 1.63                                                      | 1.97                                        | 22.70                                                     |
|                                        | <b>Ni(NO<sub>3</sub>)<sub>2</sub>·6H<sub>2</sub>O (g)</b> | <b>SnCl<sub>4</sub>·5H<sub>2</sub>O (g)</b> | <b>30% colloidal silica</b>                               |
| 3Ni-3Sn/SiO <sub>2</sub>               | 1.63                                                      | 1.97                                        | 30.00                                                     |
|                                        | <b>Co(NO<sub>3</sub>)<sub>2</sub>·6H<sub>2</sub>O (g)</b> | <b>SnCl<sub>4</sub>·5H<sub>2</sub>O (g)</b> | <b>Zn(NO<sub>3</sub>)<sub>2</sub>·6H<sub>2</sub>O (g)</b> |
| 3Co-3Sn/ZnO                            | 1.64                                                      | 1.97                                        | 33.23                                                     |
|                                        | <b>Cu(NO<sub>3</sub>)<sub>2</sub>·xH<sub>2</sub>O (g)</b> | <b>SnCl<sub>4</sub>·5H<sub>2</sub>O (g)</b> | <b>Zn(NO<sub>3</sub>)<sub>2</sub>·6H<sub>2</sub>O (g)</b> |
| 3Cu-3Sn/ZnO                            | 0.97                                                      | 1.97                                        | 33.23                                                     |

**Table S2.** The amount of H<sub>2</sub> consumed estimated from H<sub>2</sub>-TPR analysis and the surface atomic concentration, and Sn/Ni ratio of the catalysts from XPS analysis.

| Catalyst    | H <sub>2</sub> consumed (mmol/g) | Ni (at%/wt%) | Sn (at%/wt%) | Zn (at%/wt%) | Ni <sup>2+</sup> /Ni total | Sn <sup>2+/4+</sup> /Sn total | Sn/Ni (surface) |
|-------------|----------------------------------|--------------|--------------|--------------|----------------------------|-------------------------------|-----------------|
| Ni/ZnO      | 1.75                             | 7.0/13.1     | -            | 28.1/58.4    | -                          | -                             | -               |
| Sn/ZnO      | 1.23                             | -            | 12.7/36.2    | 27.5/43.0    | -                          | -                             | -               |
| 3Ni-1Sn/ZnO | 1.77                             | 4.4/5.6      | 13.8/36.0    | 27.6/39.5    | 65.6                       | 82.3                          | 3.1             |
| 3Ni-2Sn/ZnO | 1.61                             | 3.7/4.9      | 13.7/36.7    | 25.5/37.7    | 62.2                       | 73.0                          | 3.7             |
| 3Ni-3Sn/ZnO | 1.73                             | 2.7/3.5      | 14.0/37.0    | 27.1/39.5    | 57.0                       | 67.9                          | 5.2             |

**Table S3.** Catalytic results of furfuryl alcohol (FAL) hydrogenolysis over 4% and 6% (3Ni–3Sn)/ZnO catalysts.

| Catalyst         | Tem<br>P<br>(°C) | H <sub>2</sub><br>(bar) | Conv<br>· (%) | Product yield (%) |         |      |      |      |        |
|------------------|------------------|-------------------------|---------------|-------------------|---------|------|------|------|--------|
|                  |                  |                         |               | 1,2-PDO           | 1,5-PDO | THFA | MTHF | 2-MF | Others |
| 4% (3Ni–3Sn)/ZnO | 250              | 40                      | 100           | 66.4              | 17.4    | 9.4  | 0.6  | 1.3  | 2.9    |
| 6% (3Ni–3Sn)/ZnO | 250              | 40                      | 100           | 72.4              | 16.8    | 4.6  | 0.9  | 1.4  | 3.8    |

Reaction conditions: 10% FAL in IPA, 1.0 g of catalyst, WHSV = 1.0, H<sub>2</sub> 40 bar, H<sub>2</sub> flow 60 cc/min, and TOS < 50 h.

**Table S4.** Effect of pressure in furfuryl alcohol (FAL) hydrogenolysis over 3Ni–3Sn/ZnO catalyst.

| Entry | H <sub>2</sub> (bar) | Conv. (%) | Product yield (%) |         |      |      |      |        |
|-------|----------------------|-----------|-------------------|---------|------|------|------|--------|
|       |                      |           | 1,2-PDO           | 1,5-PDO | THFA | MTHF | 2-MF | Others |
| 1     | 5                    | 100       | 14.6              | 1.6     | 2.1  | 34.2 | 41.2 | 6.3    |
| 2     | 10                   | 100       | 43.3              | 3.5     | 1.4  | 22.9 | 23.3 | 5.6    |
| 3     | 20                   | 100       | 74.3              | 6.4     | 5.3  | 4.5  | 5.1  | 4.4    |
| 4     | 30                   | 100       | 83.5              | 6.2     | 5.3  | 1.6  | 1.3  | 2.1    |
| 5     | 40                   | 100       | 90.1              | 7.3     | 0.5  | 0.3  | 0.2  | 1.6    |

Reaction conditions: 10% FAL in IPA, 1.0 g of catalyst, 250 °C, WHSV = 1.0, H<sub>2</sub> pressure = 5–40 bar, H<sub>2</sub> flow = 60 cc/min, and TOS 20–50 h.



**Table S5.** Catalytic result of tetrahydrofurfuryl alcohol (THFA) hydrogenolysis over 3Ni–3Sn/ZnO catalyst.

| Catalyst    | Temp (°C) | H <sub>2</sub> (bar) | Conv. (%) | Product yield (%) |         |      |      |        |
|-------------|-----------|----------------------|-----------|-------------------|---------|------|------|--------|
|             |           |                      |           | 1,2-PDO           | 1,5-PDO | MTHF | 2-MF | Others |
| 3Ni–3Sn/ZnO | 250       | 40                   | 100       | 89.4              | 7.4     | 1.7  | 0.6  | 2.9    |

Reaction conditions: 10% THFA in IPA, 0.1 g of catalyst, WHSV = 1.0, H<sub>2</sub> 40 bar, H<sub>2</sub> flow 60 cc/min, and TOS < 50 h.

**Table S6.** Binding energies of THFA, FAL, and H over Ni (111), Ni<sub>3</sub>Sn (100), and Ni<sub>3</sub>Sn<sub>2</sub> (101) surfaces. T = 250 °C and P = 6 MPa.

| Surface                               | Binding energy of THFA (eV) | Binding energy of FAL (eV) | Binding energy of H (eV) |
|---------------------------------------|-----------------------------|----------------------------|--------------------------|
| Ni (111)                              | 2.10                        | 2.23                       | -0.26                    |
| Ni <sub>3</sub> Sn (100)              | 1.86                        | 1.90                       | -0.62                    |
| Ni <sub>3</sub> Sn <sub>2</sub> (101) | 1.81                        | 2.23                       | -0.14                    |
